# Supplementary material
Source: Springer Nature journal article supplement (https://www.springermedizin.de/resource/supplementary/12902_2012_153_MOESM1_ESM.pdf/9515682)
Supplement: MOESM1 [file 9515682]

Approval by the Medical Ethics Committee of the UMMC

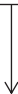

A list of patients who fulfilled the requirements of the ICD-10 code E11.0-11.9 for T2DM and admitted to the UMMC from January 2009 to December 2011 was generated from Medication Management and Use System (MMUS)  
*(535 patients)*

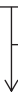

Patients' medical records and medication records were successfully retrieved  
*(422 patients)*

Failed to obtain medical records or missing data  
*(113 patients)*

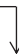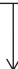

All the patients were screened for hypertension

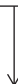

Eligible patients who fulfilled the inclusion criteria  
*(200 patients)*

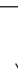

Data collection

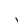

Data analysis
